# Supplementary material for: Whole Transcriptome Analysis on Sepsis Caused by Pyogenic Liver Abscess
Source: Research Square preprint supplement (doi:10.21203/rs.3.rs-212726/v1), 2021-03-01
Supplement: Supplementary file 1 [file b2398bc22ff50150da8c8edf.xlsx]

## Sheet: miRNAs_GO
Enrichment analysis of differentially expressed miRNAs in the categories biological process, cellular component and molecular function.
ID	Description	GeneRatio	BgRatio	pvalue	padjust	qvalue	Count	Subontologies	group	geneID
GO:0033130	acetylcholine receptor binding	8/2967	12/17632	0.000165785	0.19115	0.189344	8	MF	M0_vs_C	LY6H/DLG4/PSCA/RER1/RIC3/LYNX1/RAPSN/SLURP2
GO:0017136	NAD-dependent histone deacetylase activity	9/2967	16/17632	0.000391985	0.22598	0.223844	9	MF	M0_vs_C	SIRT2/HDAC11/HDAC3/HDAC10/SIRT6/HDAC5/SIRT3/HDAC6/HDAC1
GO:0034979	NAD-dependent protein deacetylase activity	9/2967	17/17632	0.000708806	0.272418	0.269844	9	MF	M0_vs_C	SIRT2/HDAC11/HDAC3/HDAC10/SIRT6/HDAC5/SIRT3/HDAC6/HDAC1
GO:0017124	SH3 domain binding	35/2967	127/17632	0.00159514	0.371226	0.367719	35	MF	M0_vs_C	PLSCR3/RAD9A/ENKUR/BCAR1/NCF1/EFS/DENND1A/GRIK5/INPP5D/INPPL1/DAB2IP/CIT/ADAM12/RAPGEF1/CABYR/ILK/ZNF106/ARHGAP27/ITGB1BP2/ELMO3/AFAP1L2/ABI3/SH2D2A/SH3GL1/ARHGAP6/SIRPA/DOCK1/SHANK3/PRKN/SHANK2/WAS/ELMO1/HCLS1/ESPN/ADAM19
GO:0035091	phosphatidylinositol binding	58/2967	240/17632	0.00217713	0.371226	0.367719	58	MF	M0_vs_C	WDR45/TNFAIP8L3/PLEKHA8/TECPR1/SNX33/PLEKHA4/SNX19/ARAP1/DPEP1/GSDMD/PHF12/SNX32/NCF1/ZFYVE9/DAPP1/DENND1A/OSBP/SYT9/RAB35/PHLDA3/DAB2IP/NISCH/OSBPL5/NOXO1/NUMA1/HS1BP3/PLD2/WDR45B/SH3PXD2B/SCARB1/PIK3C2B/SNX8/PARD3/COMMD1/MCF2L/TULP1/TWF2/PIGU/RS1/ARFIP1/PITPNM1/ARHGAP33/ARFIP2/CLVS2/SNX2/PIK3C2A/TULP3/SNX12/SYT7/LDLRAP1/KCNQ1/WIPI2/PLD1/FES/ZFYVE1/SNX11/ITPR3/SNX20
GO:0048568	embryonic organ development	110/2927	422/18493	3.44448e-08	0.000211766	0.000197749	110	BP	M0_vs_C	STIL/ERCC1/ZIC1/HOXC9/ERCC2/AHI1/GATA2/HNF1B/DCANP1/OSR1/MICAL2/WNT2/ASCL2/VASH1/MMP14/SENP2/FOXL2/THOC5/CC2D2A/SLC44A4/HOXA6/NAGLU/NSDHL/SHOX2/PCGF2/HAND2/CDKN1C/RARG/FRZB/EFNA1/EYA1/TGFB1/GBX2/EGFR/FOXH1/SNAI1/RNF112/MYO3A/ALX4/CRB2/TRIOBP/CCDC40/LIF/PAX5/USH1G/TGFB3/DSCAML1/TBX2/POLE/NES/CELSR1/FOXN4/SUFU/FGFR2/SPINT1/DNAJB6/ID3/MED1/SYF2/GDF3/SPINT2/ENG/TH/NKX2-5/NKX3-2/KRT8/COL2A1/WNT1/WNT3A…
GO:0048562	embryonic organ morphogenesis	72/2927	284/18493	2.12342e-05	0.0619177	0.0578193	72	BP	M0_vs_C	STIL/ZIC1/HOXC9/AHI1/GATA2/HNF1B/DCANP1/OSR1/MICAL2/MMP14/FOXL2/SLC44A4/HOXA6/NAGLU/SHOX2/PCGF2/HAND2/RARG/FRZB/EFNA1/EYA1/GBX2/FOXH1/MYO3A/ALX4/CRB2/TRIOBP/CCDC40/PAX5/USH1G/TGFB3/DSCAML1/TBX2/CELSR1/FOXN4/SUFU/FGFR2/ENG/TH/NKX2-5/NKX3-2/COL2A1/WNT1/WNT3A/MFAP2/WDR19/WDPCP/PAX2/GNAS/FUZ/MEGF8/HOXB1/WNT9B/KCNQ4/HOXC4/SCRIB/HOXB4/SHH/BMP4/ABR/TBX15/TULP3/HMX2/LHX1/NDRG4/STRA6/HIPK1/GRHL2/HOXB6/ATP…
GO:0001654	eye development	84/2927	351/18493	4.52406e-05	0.0619177	0.0578193	84	BP	M0_vs_C	TSKU/AHI1/DIO3/SLC25A25/STAT3/NECTIN3/CRYBB2/WNT2/JMJD6/TRPM1/FOXL2/CC2D2A/NAGLU/WNT7A/SOX8/FJX1/VSX1/COL5A1/CDKN1C/RARG/CYP1A1/TGFB1/SMARCA4/EGFR/NRL/LPCAT1/DLX1/FKBP8/MTERF4/TBX2/NES/FZR1/FOXN4/SH3PXD2B/ZEB2/GNB1/NR2E1/MED1/RAX/GDF3/TH/PRSS56/B9D1/BAX/JUN/NINJ1/MFAP2/CASP2/ZDHHC16/WDR19/CPAMD8/SIX5/WDPCP/DLL4/PAX2/TULP1/ACVRL1/RS1/WNT9B/SIPA1L3/CABP4/SHH/CHRDL1/BMP4/TULP3/LHX1/MDM1/ZNF513/RXRA/…
GO:0048880	sensory system development	85/2927	357/18493	4.9661e-05	0.0619177	0.0578193	85	BP	M0_vs_C	TSKU/AHI1/DIO3/SLC25A25/STAT3/NECTIN3/CRYBB2/WNT2/JMJD6/TRPM1/FOXL2/CC2D2A/SLC44A4/NAGLU/WNT7A/SOX8/FJX1/VSX1/COL5A1/CDKN1C/RARG/CYP1A1/TGFB1/SMARCA4/EGFR/NRL/LPCAT1/DLX1/FKBP8/MTERF4/TBX2/NES/FZR1/FOXN4/SH3PXD2B/ZEB2/GNB1/NR2E1/MED1/RAX/GDF3/TH/PRSS56/B9D1/BAX/JUN/NINJ1/MFAP2/CASP2/ZDHHC16/WDR19/CPAMD8/SIX5/WDPCP/DLL4/PAX2/TULP1/ACVRL1/RS1/WNT9B/SIPA1L3/CABP4/SHH/CHRDL1/BMP4/TULP3/LHX1/MDM1/ZNF5…
GO:0150063	visual system development	84/2927	352/18493	5.0356e-05	0.0619177	0.0578193	84	BP	M0_vs_C	TSKU/AHI1/DIO3/SLC25A25/STAT3/NECTIN3/CRYBB2/WNT2/JMJD6/TRPM1/FOXL2/CC2D2A/NAGLU/WNT7A/SOX8/FJX1/VSX1/COL5A1/CDKN1C/RARG/CYP1A1/TGFB1/SMARCA4/EGFR/NRL/LPCAT1/DLX1/FKBP8/MTERF4/TBX2/NES/FZR1/FOXN4/SH3PXD2B/ZEB2/GNB1/NR2E1/MED1/RAX/GDF3/TH/PRSS56/B9D1/BAX/JUN/NINJ1/MFAP2/CASP2/ZDHHC16/WDR19/CPAMD8/SIX5/WDPCP/DLL4/PAX2/TULP1/ACVRL1/RS1/WNT9B/SIPA1L3/CABP4/SHH/CHRDL1/BMP4/TULP3/LHX1/MDM1/ZNF513/RXRA/…
GO:0019898	extrinsic component of membrane	76/3100	287/19659	2.02109e-06	0.00150369	0.00137009	76	CC	M0_vs_C	COQ4/WDR45/PRSS8/MTMR3/GBA/UBXN6/KCNAB2/BLK/SLA2/OSR1/SNX33/WNT2/NCF1/STAC2/TAMM41/PTK6/DLG4/CDH15/CDH6/SOCS1/SYTL3/CDK16/ASPSCR1/DOC2A/NUMA1/APC2/MATK/ULK1/RNF112/GNG3/PACSIN2/MGLL/FGR/DNAJA3/COQ8B/RNF40/WDR45B/NDUFAF5/CNTFR/GNB1/PIK3C2B/NMT1/MICALL1/WDR91/GNA11/CRKL/ZC3H12A/SYTL1/COQ5/GNGT2/GNAZ/MUC16/RS1/GNAS/CTNNA2/GNA15/SCRIB/CDH13/CDH12/PIK3C2A/CDH7/SHANK3/GNAO1/CDH24/TOR1A/WIPI2/FES/ZFYVE1…
GO:0042581	specific granule	44/3100	160/19659	0.000105432	0.0392207	0.0357359	44	CC	M0_vs_C	TOLLIP/MMP8/AGPAT2/OSCAR/TRPM2/CTSD/GPR84/KCNAB2/KPNB1/CFP/GSDMD/STX4/MMP25/ADAM8/LAIR1/RETN/SPTAN1/MLEC/CYFIP1/SLPI/TMEM63A/HP/VAMP1/CD177/DNAJC5/TOM1/CHIT1/RAB44/RAB37/HMOX2/GHDC/LAMTOR1/CNN2/ADGRG3/AOC1/OLR1/HGSNAT/ELANE/SLCO4C1/CEACAM3/CHRNB4/ATP8A1/ITGAL/PLD1
GO:0043235	receptor complex	90/3100	396/19659	0.000158753	0.0393706	0.0358725	90	CC	M0_vs_C	CD3G/TOLLIP/GFRAL/CD74/ZAP70/TRIL/GPR84/CD6/ERBB2/ABHD12/P2RX2/ITGB5/IL6R/GPRC5C/CNIH3/GPR37L1/IL10RB/CHRNB3/VLDLR/FLT1/CSF2RA/HTR3B/IL5RA/DLG4/AIP/GRIN2C/GRIK5/CHRNB2/NPR1/TRAF2/CD247/CHRND/PLXNA3/PLXNA1/CD3D/CPT1C/TRAF3/GABBR1/EGFR/CD79A/EPHB3/CRLF1/GPR62/TAS1R3/FLT4/FGFR3/GABBR2/GRIN3A/FGFR2/APP/ERBB4/CNTFR/TRPV3/ENG/PLXNB1/ITGA7/VIPR1/FGFR4/LIME1/TYRO3/ITGA5/RAMP3/ITGAX/CRLF2/P2RX3/GPR119/HJV…
GO:0015629	actin cytoskeleton	105/3100	483/19659	0.00028703	0.0533876	0.048644	105	CC	M0_vs_C	ACTA1/CORIN/MTSS1/MYO7B/SYNPO/TAX1BP3/LASP1/CROCC/AFAP1/GBP2/MYL6B/ZNF174/BCAR1/FHL3/CTTN/FBLIM1/ADAM8/MYOZ3/FLT1/ZNF74/APBB3/SPTBN2/RTKN/TLN2/PRKCZ/SPTAN1/BMF/ARPC4/DBNL/ABLIM2/ZNF185/CORO1A/ZNF664-RFLNA/ESPNL/APC2/BIN3/RFLNA/ACTR1A/ARC/MYO3A/ILK/TRIOBP/FGR/ADD1/DNAJA3/PARVG/ADD2/SAMD14/USH1G/FHOD1/MYL9/PKNOX2/TIGD5/SMTNL1/CARMIL1/PVALEF/CAPZA3/SH3PXD2B/MYH9/RND1/SPTBN4/SRCIN1/KLHL17/SPECC1L/STX…
GO:0005774	vacuolar membrane	88/3100	397/19659	0.000446429	0.0664286	0.0605263	88	CC	M0_vs_C	ATP6V1F/BLOC1S1/ABCC1/CD74/ABCB9/TRPM2/FPR1/GABARAPL2/MAP1LC3A/ARL8A/GBA/UBXN6/AP1M2/TECPR1/SPPL2C/CTSA/ATP6V0A1/DPP4/SLC12A4/VLDLR/CD68/MAN2B2/AP2S1/ATP6V0B/SIDT2/ITM2C/PNPLA7/SPNS1/SPG11/STX7/CYB561/ECE1/ULK1/TMEM63A/PLEKHM1/BORCS6/LPCAT1/TPCN2/AP1B1/GFAP/ABCC3/SCARB1/RAB5C/GNB1/AP1S1/TMEM179B/GABARAPL1/DNAJC5/GAA/TOM1/CYB561A3/RAB44/TMEM9/AP2A1/GNA11/RAB37/STARD3/LAMTOR1/AP2M1/SLC30A3/DDOST/DT…
GO:0017136	NAD-dependent histone deacetylase activity	8/1964	16/17632	0.000131747	0.124193	0.122456	8	MF	T7_vs_M0	SIRT2/HDAC11/HDAC8/SIRT6/HDAC5/SIRT3/HDAC6/HDAC1
GO:0034979	NAD-dependent protein deacetylase activity	8/1964	17/17632	0.000224581	0.124193	0.122456	8	MF	T7_vs_M0	SIRT2/HDAC11/HDAC8/SIRT6/HDAC5/SIRT3/HDAC6/HDAC1
GO:0016829	lyase activity	34/1964	183/17632	0.00188218	0.577522	0.569442	34	MF	T7_vs_M0	GUCY1A1/ENO3/GUCY2D/PDXDC1/GAD1/HACD3/NEIL2/DDC/GLO1/ACO2/NPR1/SCLY/ACOD1/HDC/UROS/CHAC1/FTCD/PISD/PCK1/MLYCD/ADCY6/ADCY1/NAXD/ADCY7/SDSL/MVD/LTC4S/ASL/FASN/GMDS/ODC1/RPS3/CA4/CA7
GO:0019838	growth factor binding	27/1964	137/17632	0.00222836	0.577522	0.569442	27	MF	T7_vs_M0	FLT1/LRRC32/IL10RA/SPINT3/WFIKKN2/COL5A1/FGFRL1/IL6R/IL2RB/EGFR/NGFR/RHBDF1/FLT4/FGFR2/ENG/FGFR4/COL2A1/VASN/IL1R2/SCN5A/IL1RN/ACVRL1/IL1R1/GLG1/FURIN/KAZALD1/PDGFRB
GO:0019869	chloride channel inhibitor activity	5/1964	10/17632	0.00265394	0.577522	0.569442	5	MF	T7_vs_M0	STX7/STX1A/WNK2/VAMP8/WNK4
GO:0010959	regulation of metal ion transport	64/1941	376/18493	6.7132e-05	0.197105	0.188416	64	BP	T7_vs_M0	KCNAB2/OSR1/RCVRN/CACNG1/PDE4D/RANGRF/STIM1/CCL5/STAC2/F2RL3/LPAR3/KCNRG/FXYD7/ADORA2A/OPRL1/ARRB2/CACNB1/KCNC1/CALM2/TGFB1/TSPO/CACNB3/DRD2/WFS1/CORO1A/STC2/JPH3/BCL2/HOMER2/TRPV3/NKX2-5/WNK2/BAX/LIME1/SNTA1/RAMP3/BPIFA1/HAMP/DPP6/P2RX3/COMMD1/RRAD/BAK1/SPTBN4/LILRB1/CRACR2B/SCN5A/SLC30A10/FXYD1/WNK4/SCN1B/KCNQ1/HFE/FXYD6/STAC3/STAC/AHNAK/PDGFRB/CAMK2A/HPCA/TRIM27/EHD3/PML/REM2
GO:0098693	regulation of synaptic vesicle cycle	26/1941	114/18493	0.000104303	0.197105	0.188416	26	BP	T7_vs_M0	NAPB/CHRNB3/ADORA2A/GRIK5/CHRNB2/ADRA1A/PLAA/DNM1/DRD2/CYFIP1/PRKAR1B/BRSK2/GIPC1/ADCY1/CPLX2/DNAJC5/STX1A/SH3GL1/NAPA/TOR1A/CHRNA4/PLD1/CAMK2A/WNT7A/SNAPIN/GRIPAP1
GO:1901293	nucleoside phosphate biosynthetic process	59/1941	347/18493	0.000130767	0.197105	0.188416	59	BP	T7_vs_M0	STAT3/RCVRN/GUCY1A1/ENO3/GUCY2D/PDHB/AGPAT2/IDH2/TAMM41/GUCA1B/ADORA2A/UCK1/NPR1/GPD1/ELOVL3/EIF6/TK1/HK2/TGFB1/PFKL/ACSBG2/AK2/ECD/MLYCD/ADCY6/ADCY1/MLXIPL/GUCA2A/TBPL1/ADA/NAXD/IMPDH1/ATP5F1D/ADCY7/OGDH/NME4/DHODH/TMSB4X/ACSS1/NME3/GALK1/ACSS2/CHCHD10/NNMT/FASN/PARP9/ATP5PF/TPI1/LHPP/ACSF3/ZBTB7A/SIRT6/PFAS/ENTPD8/CTPS2/CDADC1/AMPD2/HPCA/GUCA2B
GO:1901385	regulation of voltage-gated calcium channel activity	12/1941	36/18493	0.000194452	0.197105	0.188416	12	BP	T7_vs_M0	STAC2/OPRL1/CACNB1/CACNB3/DRD2/RRAD/STAC3/STAC/AHNAK/HPCA/EHD3/REM2
GO:0006816	calcium ion transport	67/1941	413/18493	0.000199084	0.197105	0.188416	67	BP	T7_vs_M0	SLC25A25/RCVRN/CACNG1/PDE4D/STIM1/CCL5/STAC2/F2RL3/LPAR3/ADORA2A/GRIN2C/CHRNB2/OPRL1/PDE2A/ARRB2/ADRA1A/CACNG6/CACNB1/CALM2/TGFB1/TSPO/CACNB3/DRD2/CACNA2D2/WFS1/CORO1A/CACNA1F/CCL21/STC2/JPH3/TPCN2/BCL2/HOMER2/TRPV3/CACNA1I/BAX/LIME1/RAMP3/WNT3A/MICU1/P2RX3/BHLHA15/RRAD/BAK1/LILRB1/CRACR2B/ATP2A1/TRPM4/PKD1/SPG7/CHRNA4/SLC3A2/STAC3/STAC/TRPM2/RASA3/AHNAK/PDGFRB/CAMK2A/HPCA/ITPR3/CHERP/TRIM27/EHD3…
GO:0005774	vacuolar membrane	67/2060	397/19659	5.77331e-05	0.040875	0.0379823	67	CC	T7_vs_M0	GBA/UBXN6/AP1M2/TECPR1/NAPB/VLDLR/CD68/MAN2B2/AP2S1/SIDT2/ITM2C/PNPLA7/SPNS1/SPG11/STX7/SLC29A3/CYB561/ECE1/ULK1/TMEM63A/PLEKHM1/BORCS6/LPCAT1/TPCN2/ABCC3/DNAJC5/GAA/TOM1/CYB561A3/RAB44/AP1S1/TMEM9/ABCC1/AP2A1/MAP1LC3A/RAB37/UBA52/VAMP8/VASN/STARD3/LAMTOR1/AP5B1/ATG16L2/NAPA/ATP6V0B/PSAP/SPPL2C/LAMTOR4/HLA-DQB2/ATP6V0A4/TMEM179B/NPRL3/ATP8A1/ATP6V0A1/PLD1/ABCC10/ABCB9/HLA-DRB1/GLMP/VPS33B/TRPM2/A…
GO:0005765	lysosomal membrane	57/2060	344/19659	0.000323099	0.0805779	0.0748754	57	CC	T7_vs_M0	GBA/UBXN6/AP1M2/TECPR1/VLDLR/CD68/AP2S1/SIDT2/ITM2C/PNPLA7/SPNS1/SPG11/STX7/SLC29A3/CYB561/ECE1/TMEM63A/PLEKHM1/BORCS6/LPCAT1/TPCN2/DNAJC5/GAA/TOM1/CYB561A3/RAB44/AP1S1/TMEM9/AP2A1/RAB37/UBA52/VAMP8/VASN/STARD3/LAMTOR1/AP5B1/PSAP/SPPL2C/LAMTOR4/HLA-DQB2/ATP6V0A4/TMEM179B/NPRL3/ATP8A1/ATP6V0A1/PLD1/ABCC10/ABCB9/HLA-DRB1/GLMP/VPS33B/TRPM2/AHNAK/HGSNAT/EEF1A2/SNAPIN/TMEM79
GO:0098852	lytic vacuole membrane	57/2060	345/19659	0.000348399	0.0805779	0.0748754	57	CC	T7_vs_M0	GBA/UBXN6/AP1M2/TECPR1/VLDLR/CD68/AP2S1/SIDT2/ITM2C/PNPLA7/SPNS1/SPG11/STX7/SLC29A3/CYB561/ECE1/TMEM63A/PLEKHM1/BORCS6/LPCAT1/TPCN2/DNAJC5/GAA/TOM1/CYB561A3/RAB44/AP1S1/TMEM9/AP2A1/RAB37/UBA52/VAMP8/VASN/STARD3/LAMTOR1/AP5B1/PSAP/SPPL2C/LAMTOR4/HLA-DQB2/ATP6V0A4/TMEM179B/NPRL3/ATP8A1/ATP6V0A1/PLD1/ABCC10/ABCB9/HLA-DRB1/GLMP/VPS33B/TRPM2/AHNAK/HGSNAT/EEF1A2/SNAPIN/TMEM79
GO:0005769	early endosome	56/2060	341/19659	0.000455243	0.0805779	0.0748754	56	CC	T7_vs_M0	MVB12B/UBXN6/HYAL3/SNX19/F2RL1/ZFYVE9/VPS26A/AOC3/STX7/ECPAS/NISCH/DBNL/CHMP1A/NIPA1/TMEM127/CORO1A/TBC1D16/RAPGEF1/EGFR/TM9SF4/PTP4A3/ARC/CCDC93/WDFY2/RHOD/APOC3/TOM1/ST8SIA2/WDR91/RAB20/RABEP2/WNT3A/SH3GL1/COMMD1/VAMP8/SLC30A10/CD22/SNX12/LDLRAP1/KCNQ1/NF2/HFE/GGA3/PIKFYVE/AKT2/CD274/VPS33B/SAMD9L/RAB11FIP5/TRIM27/SNX8/MLC1/PARM1/GRIPAP1/PML/SNX20
GO:0043025	neuronal cell body	73/2060	483/19659	0.000853998	0.102311	0.0950702	73	CC	T7_vs_M0	SIRT2/C4A/IAPP/TMPRSS3/KNDC1/SPTBN2/DDC/PRKCZ/ADORA2A/HSP90AA1/GRIK5/KCNC1/GDPD5/DAB2IP/ILK/L1CAM/TGFB1/DRD2/CYFIP1/NSMF/APBB1/CIT/CACNA1F/NUMA1/AURKA/PTPRF/CASP3/KCNJ14/ARC/HCFC1/TXN2/RTN4R/ADA/HOMER2/CPLX2/TH/SLC6A3/FBXO31/PVALB/SNPH/DHODH/NDUFS7/GDI1/KCNN1/PTPRS/RTN4RL2/MPL/P2RX3/ALCAM/SPTBN4/TRPM4/CD22/ACVRL1/CHRNA4/RBFOX3/KNCN/P2RX6/TUBB4A/CPNE5/RAC3/VTI1A/TRPM2/HDAC6/KIF5A/SKOR1/EEF1A2/FKBP…
